# Supplementary material for: Flavacol and Its Novel Derivative 3-β-Hydroxy Flavacol from Streptomyces sp. Pv 4-95 after the Expression of Heterologous AdpA
Source: MDPI journal article supplement (doi:10.3390/microorganisms10122335), 2022-11-25
Supplement: s1 [file s1]

## Supplementary Material

### Flavacol and its Novel Derivative 3- $\beta$ -hydroxy Flavacol from *Streptomyces* sp. Pv 4-95 after the Expression of Heterologous AdpA

Stepan Tistechok<sup>1</sup>, Marc Stierhof<sup>2</sup>, Anna Kachor<sup>1,3</sup>, Maksym Myronovskyi<sup>2</sup>, Oleksandr Gromyko<sup>1,4\*</sup> and Andriy Luzhetskyy<sup>2,5\*</sup>

<sup>1</sup> Department of Genetics and Biotechnology, Ivan Franko National University of Lviv, 79005 Lviv, Ukraine; [steptistechok@gmail.com](mailto:steptistechok@gmail.com) (S.T.); [anya.aiva18@gmail.com](mailto:anya.aiva18@gmail.com) (A.K.)

<sup>2</sup> Department of Pharmaceutical Biotechnology, Saarland University, 66123 Saarbruecken, Germany; [m.stierhof@t-online.de](mailto:m.stierhof@t-online.de) (M.S.); [maksym.myronovskyi@uni-saarland.de](mailto:maksym.myronovskyi@uni-saarland.de) (M.M.)

<sup>3</sup> Explogen LLC, 79005 Lviv, Ukraine;

<sup>4</sup> Microbial Culture Collection of Antibiotic Producers, Ivan Franko National University of Lviv, 79005 Lviv, Ukraine;

<sup>5</sup> Helmholtz Institute for Pharmaceutical Research Saarland, 66123 Saarbruecken, Germany;

\*Correspondence: [a.luzhetskyy@mx.uni-saarland.de](mailto:a.luzhetskyy@mx.uni-saarland.de); Tel.: +49-681-302-70200 (A.L.); [oleksandr.gromyko@lnu.edu.ua](mailto:oleksandr.gromyko@lnu.edu.ua); Tel.: +38-032-23-94-407 (O.G.);

**Physical data of 3- $\beta$ -hydroxy flavacol (2):** white solid; 1.2 mg; UV (31% ACN in H<sub>2</sub>O + 0.1% FA)  $\lambda_{\max}$  (log  $\epsilon$ ) 226 nm (1.92) and 326 nm (1.73); <sup>1</sup>H and <sup>13</sup>C NMR data, see Table 1; ESI-TOF-MS  $m/z$  225.15903 [M+H]<sup>+</sup> (calc. for C<sub>12</sub>H<sub>20</sub>N<sub>2</sub>O<sub>2</sub> 224.1519).

>OM763959.1 *Streptomyces* sp. strain Pv4-95 16S ribosomal RNA gene, partial sequence

```
TGCAAGTCGAACGATGAACCTCCTTCGGGAGGGGATTAGTGGCGAACGGGTGAGTAACACGTGGGCAATC
TGCCCTTCACTCTGGGACAAGCCCTGGAACGGGGTCTAATACCGGATACGACTACCGACCGCATGGTCT
GGTGGTGGAAAGCTCCGGCGGTGAAGGATGAGCCCGCGGCCTATCAGCTTGTTGGTGGGGTGATGGCCTA
CCAAGGCGACGACGGGTAGCCGGCCTGAGAGGGCGACCGGCCACACTGGGACTGAGACACGGCCCAGACT
CCTACGGGAGGCGAGCAGTGGGGAATATTGCACAATGGGCGAAAGCCTGATGCAGCGACGCCGCGTGAGGG
ATGACGGCCTTCGGGTTGTAAACCTCTTTTCAGCAGGGAAGAAGCGAAAGTGACGGTACCTGCAGAAGAAG
CGCCGGCTAACTACGTGCCAGCAGCCGCGGTAATACGTAGGGCGCAAGCGTTGTCCGGAATTATTGGGCG
TAAAGAGCTCGTAGGCGGCTTGTCACGTCCGATGTGAAAGCCCGGGCTTAACCCCGGGTCTGCATTCTGA
TACGGGCAGGCTAGAGTTCCGTAGGGGAGATCGGAATTCCTGGTGTAGCGGTGAAATGCGCAGATATCAG
GAGGAACACCGGTGGCGAAGGCGGATCTCTGGGCCGATACTGACGCTGAGGAGCGAAAGCGTGGGGAGCG
AACAGGATTAGATACCCTGGTAGTCCACGCCGTAAACGTTGGGAACTAGGTGTGGGCGACATTCCACGTC
GTCCGTGCCGCAGCTAACGCATTAAAGTTCCCCGCTGGGGAGTACGGCCGCAAGGCTAAACTCAAAGGA
ATTGACGGGGGGCCCGCACAGCAGCGGAGCATGTGGCTTAATTCGACGCAACGCGAAGAACCTTACCAAG
GCTTGACATACACCGGAAACGCCCTGGAGACAGGCGCCCCCTTGTGGTCCGTGTACAGGTGGTGCATGGCT
GTCGTGAGCTCGTGTGTCGTGAGATGTTGGGTTAAGTCCCGCAACGAGCGCAACCCTTGTTCTGTGTTGCCA
GCATGCCCTTCGGGGTGATGGGGACTCACAGGAGACTGCCGGGGTCAACTCGGAGGAAGGTGGGGACGAC
GTCAAGTCATCATGCCCTTATGTCTTGGGCTGCACACGTGCTACAATGGCCGGTACAATGAGCTGCGAT
ACCGCGAGGTGGAGCGAATCTCAAAAAGCCGGTCTCAGTTCGGATTGGGGTCTGCAACTCGACCCCATGA
AGTCGGAGTTGCTAGTAATCGCAGATCAGCATTGCTGCGGTGAATACGTTCCCGGGCCTTGACACACCG
CCCGTCACGTCACGAAAGTCGGTAACACCCGAAGCCGGTGGCCCAACCCCTTGTTGGGAGGGAATCGTCTGA
```

**Figure S1.** Partial sequence of the *Streptomyces* sp. Pv4-95 16S ribosomal RNA gene.

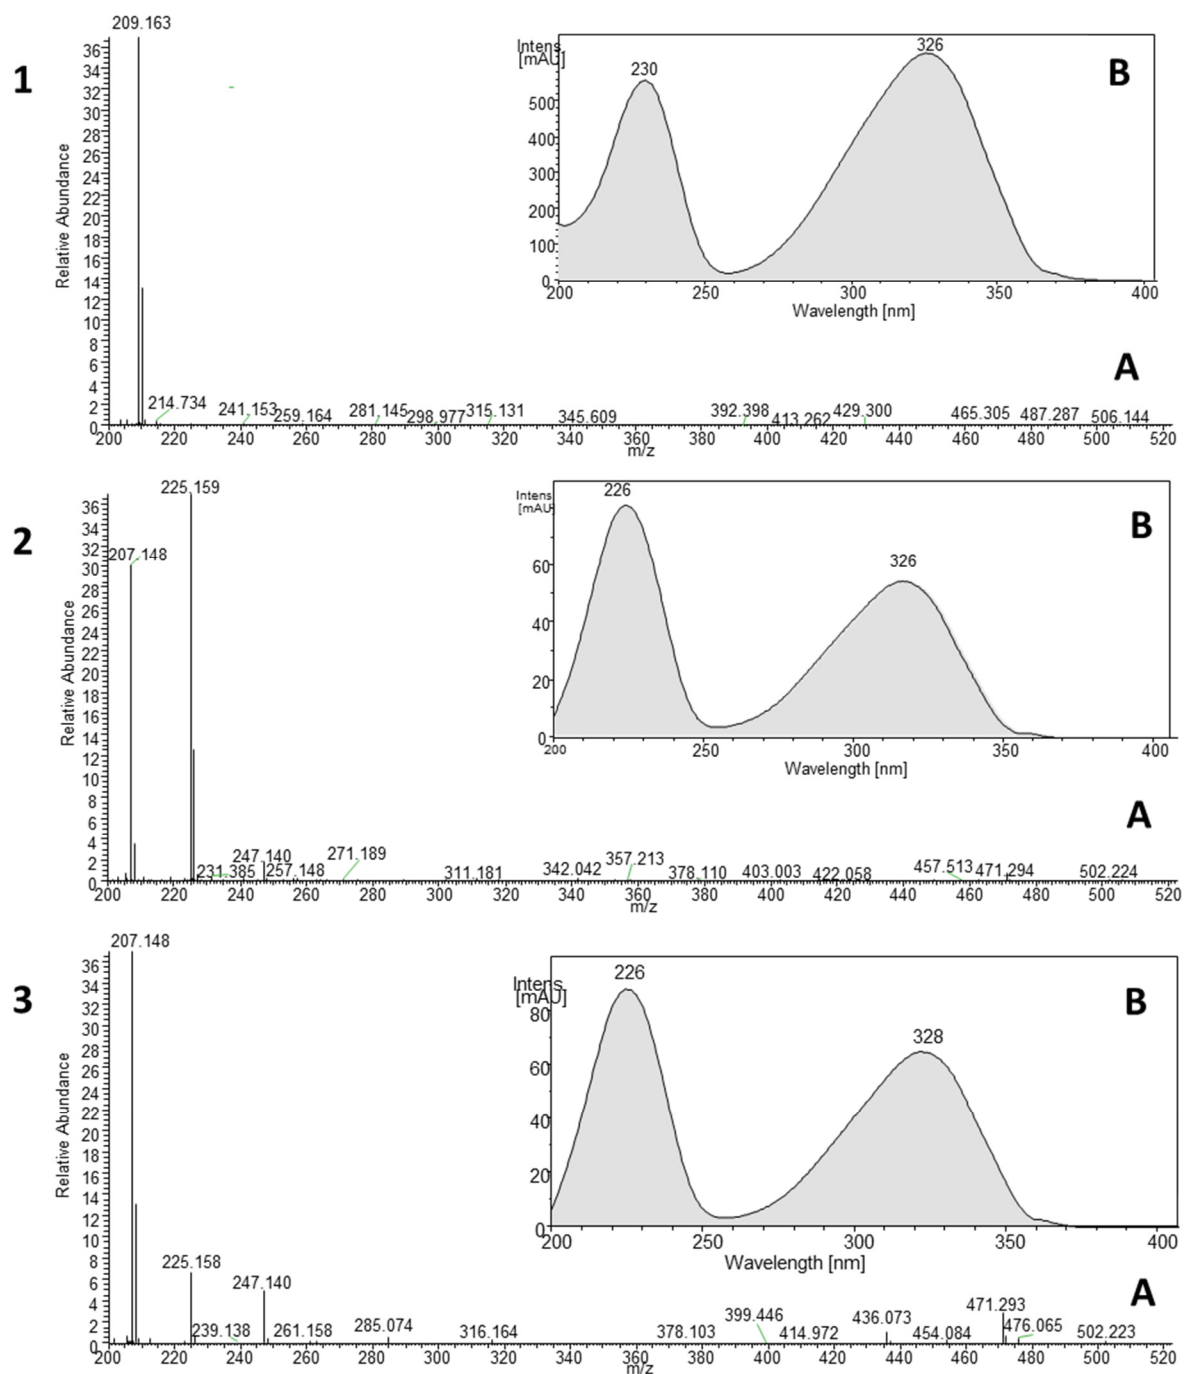

**Figure S2.** Analyses of identified peaks in the crude extract of *Streptomyces* sp. Pv 4-95adpA strain. (A) Mass spectrum and (B) UV spectrum of identified peaks corresponding to flavacol (1), 3- $\beta$ -hydroxy flavacol (2) and a compound that could not be obtained (3).

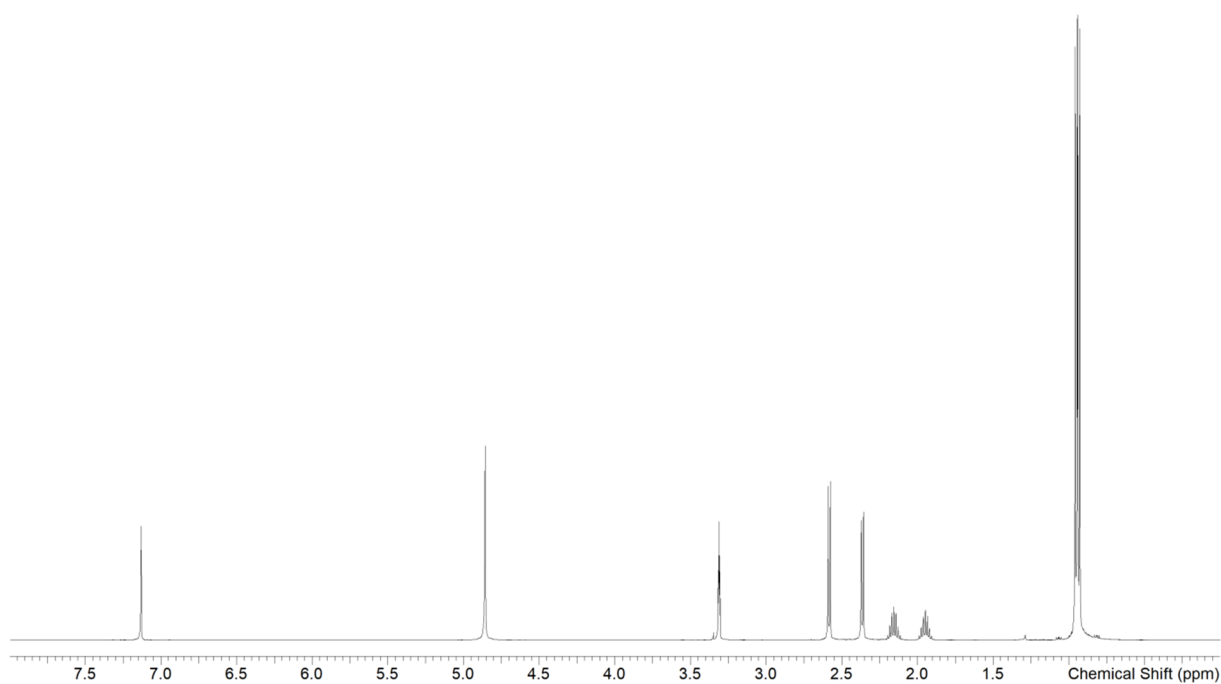

**Figure S3.**  $^1\text{H}$  NMR spectrum ( $\text{MeOD-}d_4$ , 500 MHz) of flavacol (1).

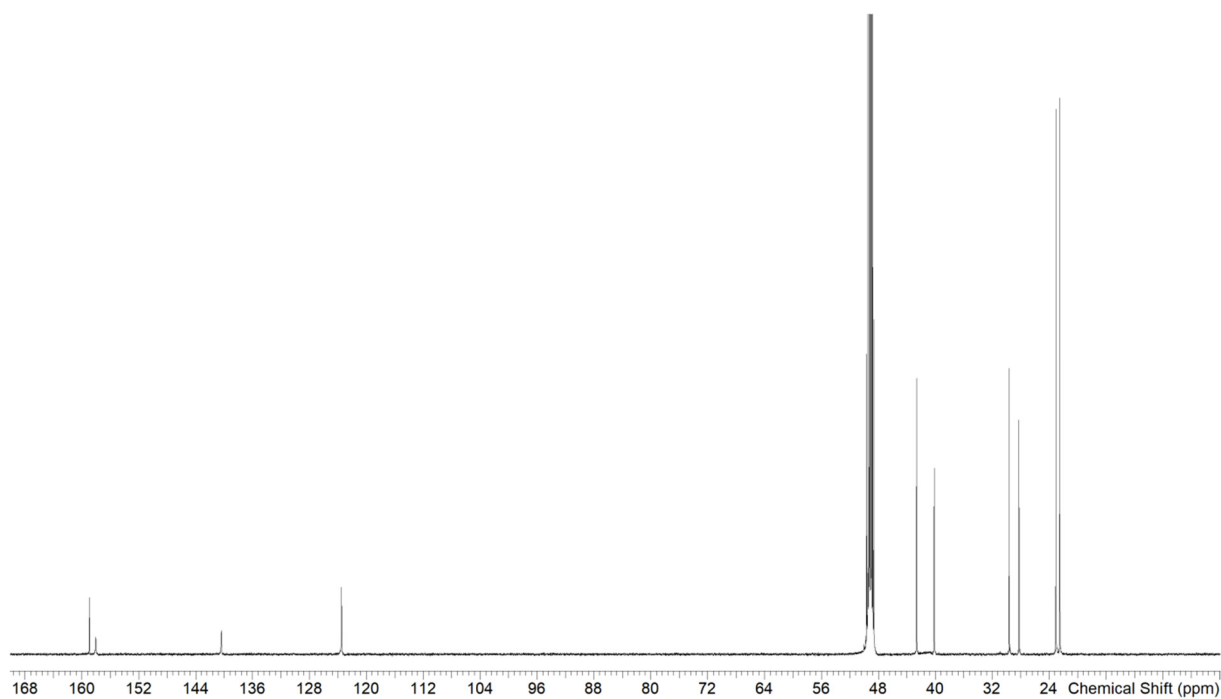

**Figure S4.**  $^{13}\text{C}$  NMR spectrum ( $\text{MeOD-}d_4$ , 125 MHz) of flavacol (1).

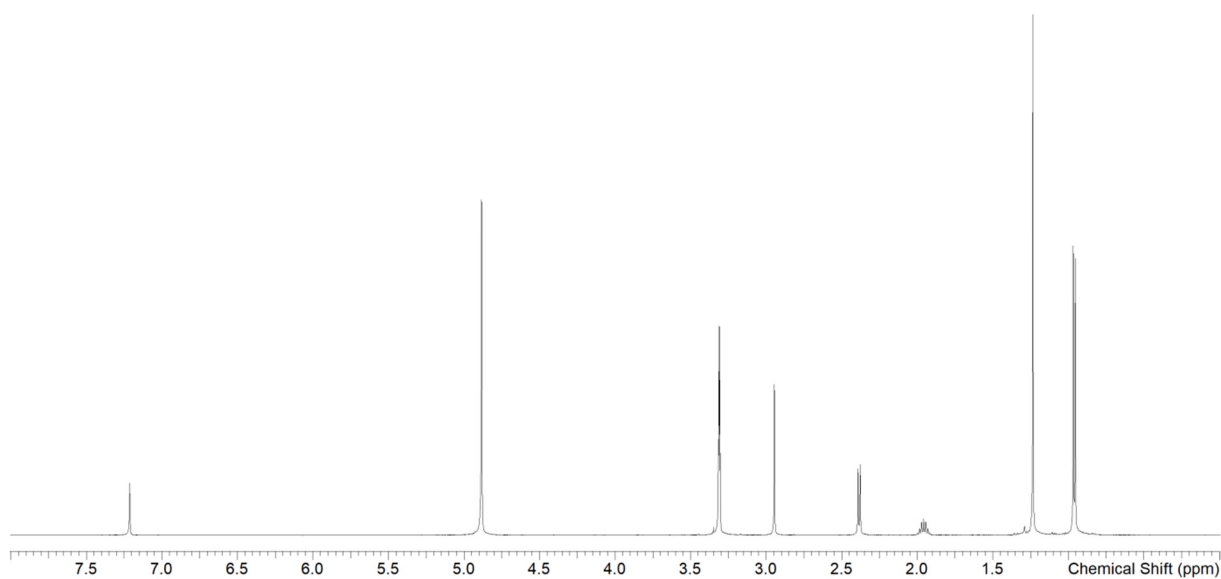

**Figure S5.**  $^1\text{H}$  NMR spectrum ( $\text{MeOD-}d_4$ , 500 MHz) of 3- $\beta$ -hydroxy flavacol (2).

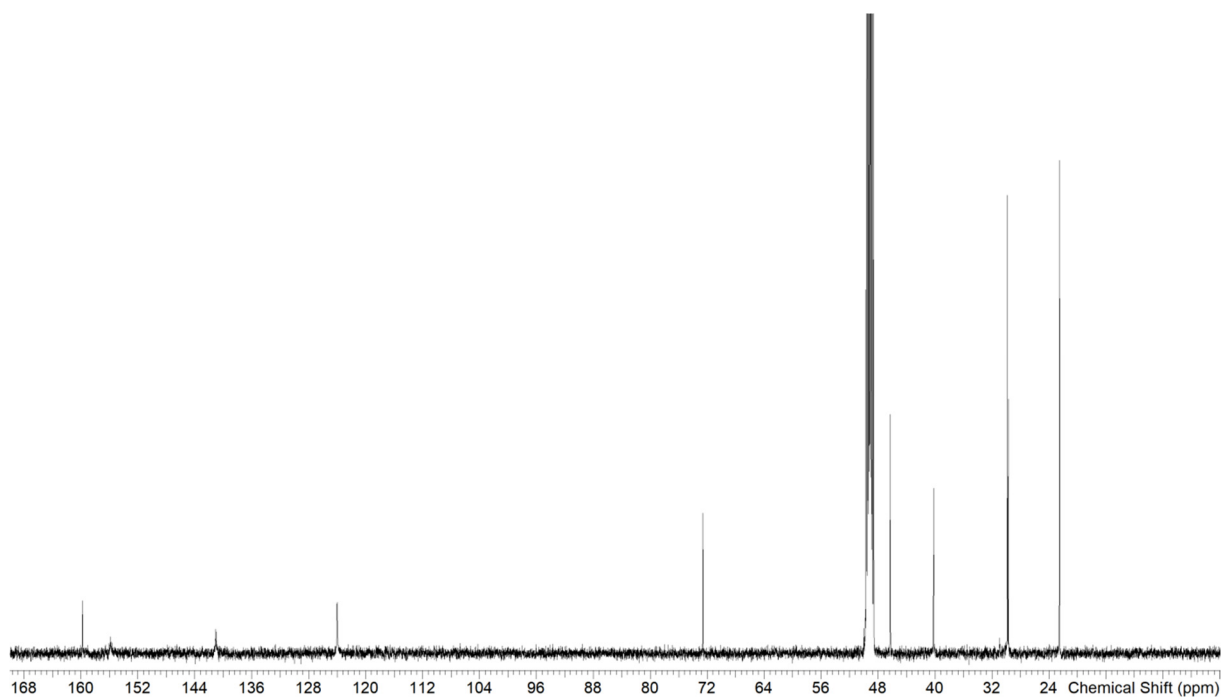

**Figure S6.**  $^{13}\text{C}$  NMR spectrum ( $\text{MeOD-}d_4$ , 500 MHz) of 3- $\beta$ -hydroxy flavacol (2).

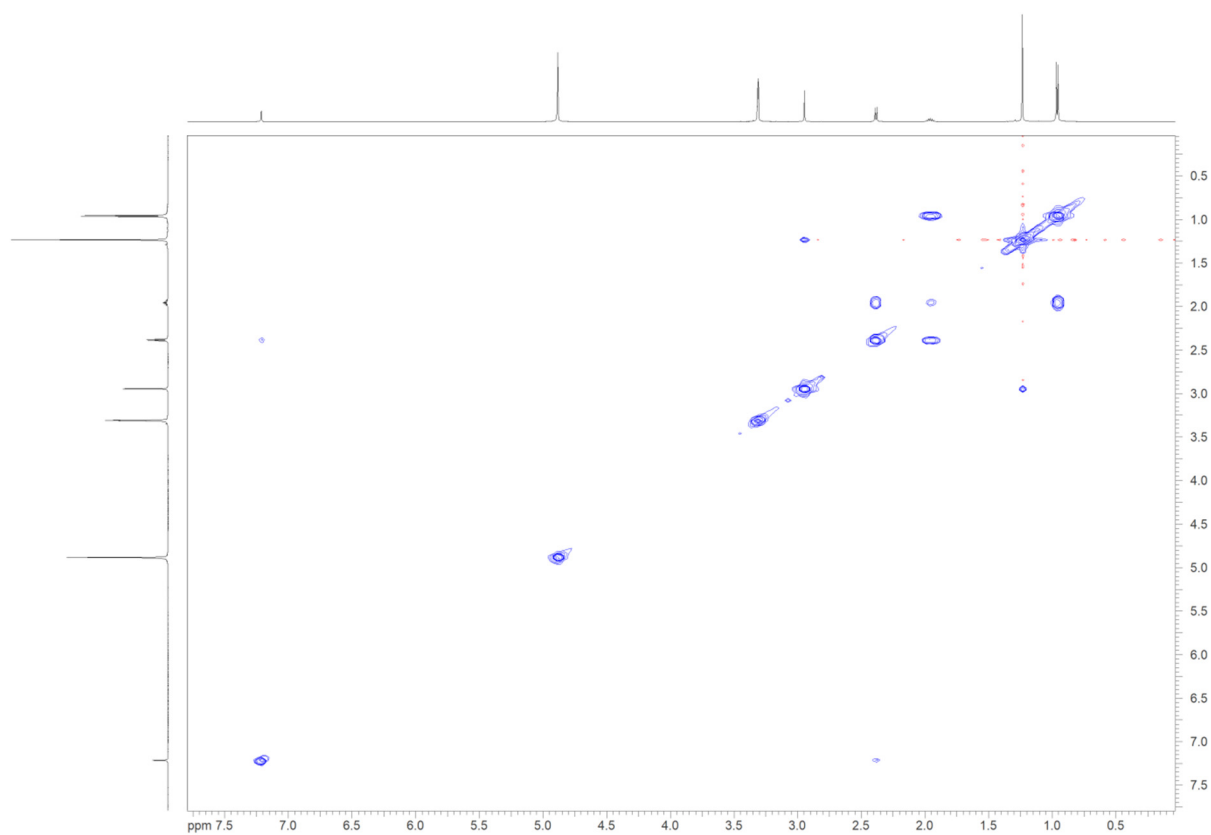

**Figure S7.**  $^1\text{H}$ - $^1\text{H}$  COSY spectrum (MeOD- $d_4$ , 500 MHz) of 3- $\beta$ -hydroxy flavacol (2).

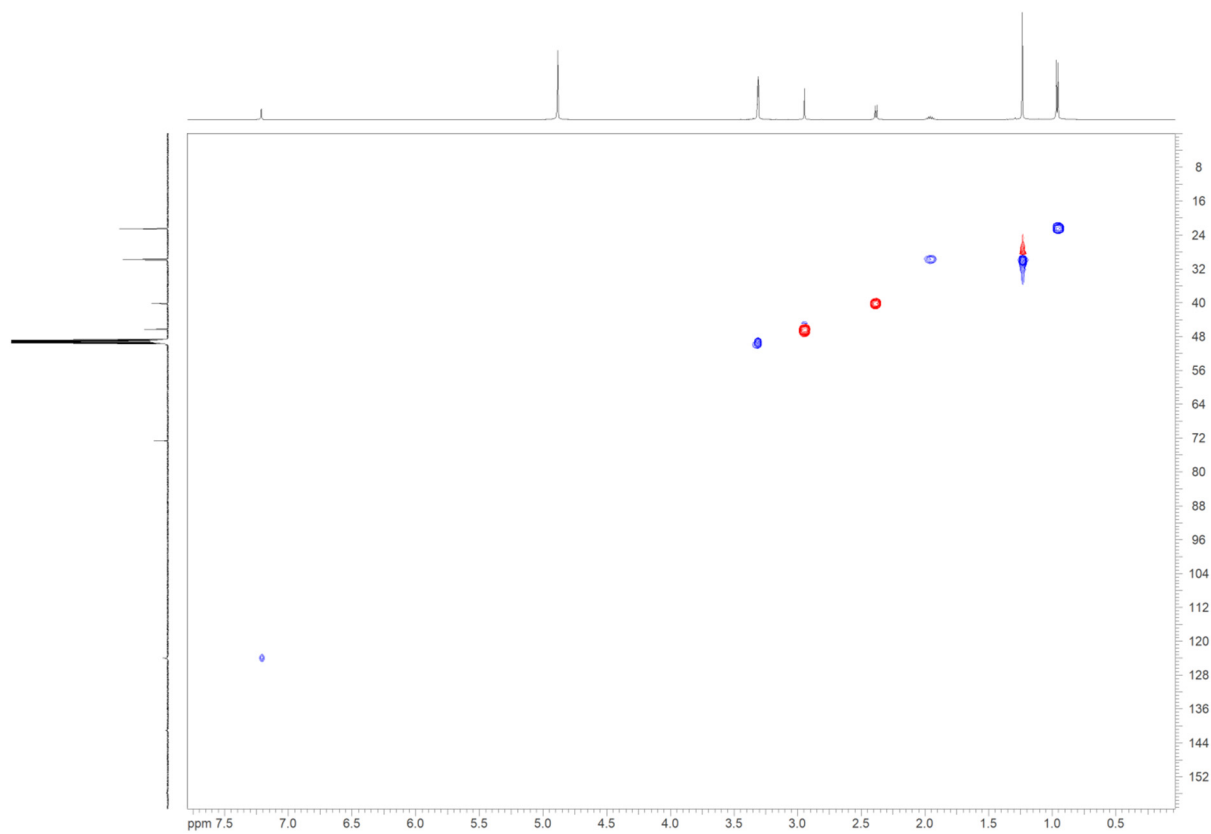

**Figure S8.** Edited-HSQC spectrum (MeOD- $d_4$ , 500 MHz) of 3- $\beta$ -hydroxy flavacol (2).

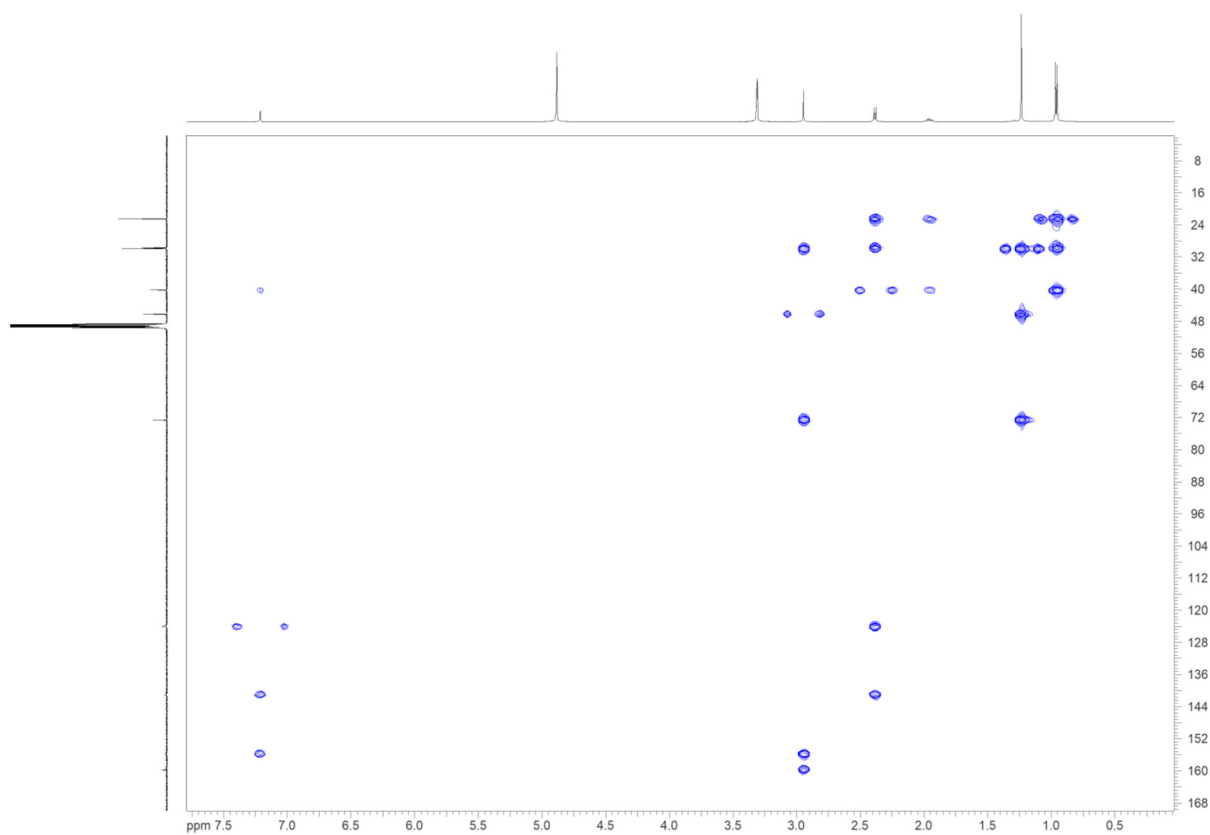

**Figure S9.** HMBC spectrum (MeOD-*d*<sub>4</sub>, 500 MHz) of 3- $\beta$ -hydroxy flavacol (2).
